# Supplementary material for: Ligand−Structure Effects on N−Heterocyclic Carbene Rhenium Photo− and Electrocatalysts of CO2 Reduction
Source: MDPI journal article supplement (doi:10.3390/molecules28104149), 2023-05-17
Supplement: s1 [file s1]

Supporting Information for

# Ligand-structure Effects on *N*-Heterocyclic Carbene Rhenium Photo- and Electrocatalysts of CO<sub>2</sub> Reduction

Lauren Kearney<sup>1</sup>, Michael P. Brandon<sup>1</sup>, Andrew Coleman<sup>1</sup>, Ann M. Chippindale<sup>2</sup>, František Hartl<sup>2\*</sup>, Ralte Lalrempuia<sup>1,3</sup>, Martin Pižl<sup>4</sup>, Mary T. Pryce<sup>1\*</sup>

## Table of Contents

|                                                                                                        |       |
|--------------------------------------------------------------------------------------------------------|-------|
| Structural Characterisation Data .....                                                                 | 2-6   |
| Extended UV-Vis Absorption spectra, Excitation spectra and 77 K Emission spectra.....                  | 7-11  |
| Lifetime Measurements.....                                                                             | 11-12 |
| Additional Photophysical Characterisation of Re-NHC-1 and Re-NHC-2 .....                               | 12-13 |
| Cyclic Voltammograms.....                                                                              | 14-15 |
| DFT-Calculated IR spectra of Re-NHC-1, singly reduced radical anion and anionic secondary product..... | 15    |
| Photocatalytic CO <sub>2</sub> Reduction.....                                                          | 16    |
| <sup>1</sup> H NMR and <sup>13</sup> C NMR Spectra .....                                               | 16-23 |

**Table S1.** Crystal data and structure refinement for Re-NHC-1 (see Chart 1 and Figure 1 in the main text).

|                                         |                                                               |                            |
|-----------------------------------------|---------------------------------------------------------------|----------------------------|
| Identification code                     | Re-NHC-1                                                      |                            |
| Molecular formula                       | $\text{C}_{23}\text{H}_{13}\text{N}_3\text{O}_3\text{BrRe}$   |                            |
| Formula weight                          | 645.48                                                        |                            |
| Temperature                             | 100(1) K                                                      |                            |
| Wavelength                              | 0.71073 Å                                                     |                            |
| Crystal system                          | Triclinic                                                     |                            |
| Space group                             | $P\bar{1}$ (#2)                                               |                            |
| Unit cell dimensions                    | $a = 9.13630(1)$ Å                                            | $\alpha = 65.357(3)^\circ$ |
|                                         | $b = 10.98913(2)$ Å                                           | $\beta = 82.916(2)^\circ$  |
|                                         | $c = 11.34750(2)$ Å                                           | $\gamma = 82.988(2)^\circ$ |
| Volume                                  | 1024.46(2) Å <sup>3</sup>                                     |                            |
| <i>Z</i>                                | 2                                                             |                            |
| Density (calculated)                    | 2.092 mg m <sup>-3</sup>                                      |                            |
| Absorption coefficient                  | 7.912 mm <sup>-1</sup>                                        |                            |
| Crystal habit                           | Yellow block                                                  |                            |
| Crystal size                            | 0.015 × 0.026 × 0.044 mm                                      |                            |
| Theta range for data collection         | 2.0452 to 30.7435°                                            |                            |
| Index ranges                            | −13 ≤ <i>h</i> ≤ 13, −15 ≤ <i>k</i> ≤ 14, −15 ≤ <i>l</i> ≤ 14 |                            |
| Reflections collected                   | 23208                                                         |                            |
| Independent reflections                 | 5320 [ <i>R</i> (int) = 0.040]                                |                            |
| Completeness to $\theta = 25.210^\circ$ | 100.0 %                                                       |                            |
| Absorption correction                   | Multi-scan                                                    |                            |
| Max. and min. transmission              | 0.888 and 0.781                                               |                            |

|                                        |                                           |
|----------------------------------------|-------------------------------------------|
| Refinement method                      | Full-matrix least-squares on $F$          |
| Data / restraints / parameters         | 4395 / 1 / 283                            |
| Goodness-of-fit on $F^2$               | 1.107                                     |
| Final $R$ indices [ $I > 3\sigma(I)$ ] | $R1 = 0.0230$ , $wR2 = 0.0216$            |
| Largest diff. peak and hole            | 0.93 and $-0.62 \text{ e}\text{\AA}^{-3}$ |
| CCDC cif deposition number             | CCDC 2244937                              |

**Table S2.** Selected bond lengths ( $\text{\AA}$ ) and angles ( $^\circ$ ) for complex Re-NHC-1.

|               |           |                       |            |
|---------------|-----------|-----------------------|------------|
| Re(1) – Br(2) | 2.6457(4) | Br(2) – Re(1) – N(1)  | 82.61(7)   |
| Re(1) – N(1)  | 2.196(2)  | Br(2) – Re(1) – C(3)  | 177.28(9)  |
| Re(1) – C(3)  | 1.940(3)  | N(1) – Re(1) – C(3)   | 95.49(11)  |
| Re(1) – C(5)  | 1.974(4)  | Br(2) – Re(1) – C(5)  | 91.10(10)  |
| Re(1) – C(7)  | 1.915(3)  | N(1) – Re(1) – C(5)   | 96.58(12)  |
| Re(1) – C(21) | 2.117(3)  | C(3) – Re(1) – C(5)   | 91.04(13)  |
| O(4) – C(3)   | 1.097(4)  | Br(2) – Re(1) – C(7)  | 94.12(10)  |
| O(6) – C(5)   | 1.140(4)  | N(1) – Re(1) – C(7)   | 172.88(12) |
| O(8) – C(7)   | 1.149(4)  | C(3) – Re(1) – C(7)   | 87.55(13)  |
| N(1) – C(26)  | 1.339(4)  | C(5) – Re(1) – C(7)   | 89.79(13)  |
| N(1) – C(30)  | 1.341(4)  | Br(2) – Re(1) – C(21) | 85.83(8)   |
| N(9) – C(10)  | 1.407(4)  | N(1) – Re(1) – C(21)  | 73.92(10)  |
| N(9) – C(21)  | 1.387(4)  | C(3) – Re(1) – C(21)  | 91.79(12)  |
| N(9) – C(26)  | 1.419(4)  | C(5) – Re(1) – C(21)  | 170.31(12) |
| N(20) – C(19) | 1.392(4)  | C(7) – Re(1) – C(21)  | 99.59(12)  |
| N(20) – C(21) | 1.340(4)  | Re(1) – N(1) – C(26)  | 117.1(2)   |
| C(10) – C(11) | 1.444(4)  | Re(1) – N(1) – C(30)  | 123.5(2)   |
| C(10) – C(19) | 1.373(4)  | Re(1) – C(21) – N(9)  | 116.5(2)   |
| C(11) – C(12) | 1.416(4)  | Re(1) – C(21) – N(20) | 138.9(2)   |
| C(11) – C(16) | 1.412(5)  | Re(1) – C(3) – O(4)   | 178.7(3)   |
| C(12) – C(13) | 1.374(5)  | Re(1) – C(5) – O(6)   | 178.8(3)   |
| C(13) – C(14) | 1.391(5)  | Re(1) – C(7) – O(8)   | 177.4(3)   |
| C(14) – C(15) | 1.378(5)  | C(26) – N(1) – C(30)  | 118.1(3)   |
| C(15) – C(16) | 1.417(5)  | C(10) – N(9) – C(21)  | 110.6(2)   |
| C(16) – C(17) | 1.476(5)  | C(10) – N(9) – C(26)  | 131.8(3)   |
| C(17) – C(18) | 1.415(4)  | C(21) – N(9) – C(26)  | 115.5(3)   |

|               |          |                       |          |
|---------------|----------|-----------------------|----------|
| C(17) – C(25) | 1.414(5) | C(19) – N(20) – C(21) | 112.0(2) |
| C(18) – C(19) | 1.419(4) | N(9) – C(10) – C(11)  | 133.2(3) |
| C(18) – C(22) | 1.408(4) | N(9) – C(10) – C(19)  | 105.5(3) |
| C(22) – C(23) | 1.364(5) | C(11) – C(10) – C(19) | 120.8(3) |
| C(23) – C(24) | 1.402(5) | C(10) – C(11) – C(12) | 124.0(3) |
| C(24) – C(25) | 1.363(5) | C(10) – C(11) – C(16) | 116.4(3) |
| C(26) – C(27) | 1.395(4) | C(12) – C(11) – C(16) | 119.4(3) |
| C(27) – C(28) | 1.371(5) | C(11) – C(12) – C(13) | 120.4(3) |
| C(28) – C(29) | 1.383(5) | C(12) – C(13) – C(14) | 120.3(3) |
| C(29) – C(30) | 1.377(5) | C(13) – C(14) – C(15) | 120.3(3) |
|               |          | C(14) – C(15) – C(16) | 121.0(4) |
|               |          | C(11) – C(16) – C(15) | 118.0(3) |
|               |          | C(11) – C(16) – C(17) | 121.4(3) |
|               |          | C(15) – C(16) – C(17) | 120.5(3) |
|               |          | C(16) – C(17) – C(18) | 119.9(3) |
|               |          | C(16) – C(17) – C(25) | 122.8(3) |
|               |          | C(18) – C(17) – C(25) | 117.3(3) |
|               |          | C(17) – C(18) – C(19) | 116.5(3) |
|               |          | C(17) – C(18) – C(22) | 120.2(3) |
|               |          | C(19) – C(18) – C(22) | 123.2(3) |
|               |          | N(20) – C(19) – C(10) | 107.0(3) |
|               |          | N(20) – C(19) – C(18) | 128.8(3) |
|               |          | C(10) – C(19) – C(18) | 124.2(3) |
|               |          | N(9) – C(21) – N(20)  | 104.6(3) |
|               |          | C(18) – C(22) – C(23) | 120.6(3) |
|               |          | C(22) – C(23) – C(24) | 119.7(3) |
|               |          | C(23) – C(24) – C(25) | 120.6(3) |
|               |          | C(17) – C(25) – C(24) | 121.5(3) |
|               |          | N(1) – C(26) – N(9)   | 114.1(3) |
|               |          | N(1) – C(26) – C(27)  | 122.4(3) |
|               |          | N(9) – C(26) – C(27)  | 123.1(3) |
|               |          | C(26) – C(27) – C(28) | 118.0(3) |
|               |          | C(27) – C(28) – C(29) | 120.3(3) |
|               |          | C(28) – C(29) – C(30) | 118.0(3) |
|               |          | N(1) – C(30) – C(29)  | 123.1(3) |

**Table S3.** Selected experimental and calculated (*in vacuo*) bond lengths (Å) for the complex Re-NHC-1.

| Lengths       | Experimental | Calculated |
|---------------|--------------|------------|
| Re(1) – Br(2) | 2.6457(4)    | 2.686      |
| Re(1) – N(1)  | 2.196(2)     | 2.244      |
| Re(1) – C(3)  | 1.940(3)     | 1.927      |
| Re(1) – C(5)  | 1.974(4)     | 1.989      |
| Re(1) – C(7)  | 1.915(3)     | 1.932      |
| Re(1) – C(21) | 2.117(3)     | 2.115      |
| O(4) – C(3)   | 1.097(4)     | 1.167      |
| O(6) – C(5)   | 1.140(4)     | 1.158      |
| O(8) – C(7)   | 1.149(4)     | 1.164      |
| N(1) – C(26)  | 1.339(4)     | 1.353      |
| N(1) – C(30)  | 1.341(4)     | 1.348      |
| N(9) – C(10)  | 1.407(4)     | 1.418      |
| N(9) – C(21)  | 1.387(4)     | 1.387      |
| N(9) – C(26)  | 1.419(4)     | 1.413      |
| N(20) – C(19) | 1.392(4)     | 1.391      |
| N(20) – C(21) | 1.340(4)     | 1.347      |
| C(10) – C(19) | 1.373(4)     | 1.379      |

**Table S4.** Selected experimental and calculated (*in vacuo*) bond angles (°) for complex Re-NHC-1.

| Angles                | Experimental | Calculated |
|-----------------------|--------------|------------|
| Br(2) – Re(1) – N(1)  | 82.61(7)     | 82.5       |
| Br(2) – Re(1) – C(3)  | 177.28(9)    | 177.4      |
| N(1) – Re(1) – C(3)   | 95.49(11)    | 95.0       |
| Br(2) – Re(1) – C(5)  | 91.10(10)    | 89.3       |
| N(1) – Re(1) – C(5)   | 96.58(12)    | 97.8       |
| C(3) – Re(1) – C(5)   | 91.04(13)    | 91.8       |
| Br(2) – Re(1) – C(7)  | 94.12(10)    | 91.1       |
| N(1) – Re(1) – C(7)   | 172.88(12)   | 168.6      |
| C(3) – Re(1) – C(7)   | 87.55(13)    | 91.3       |
| C(5) – Re(1) – C(7)   | 89.79(13)    | 91.5       |
| Br(2) – Re(1) – C(21) | 85.83(8)     | 85.7       |
| N(1) – Re(1) – C(21)  | 73.92(10)    | 73.2       |
| C(3) – Re(1) – C(21)  | 91.79(12)    | 92.9       |
| C(5) – Re(1) – C(21)  | 170.31(12)   | 170.1      |
| C(7) – Re(1) – C(21)  | 99.59(12)    | 97.0       |
| Re(1) – N(1) – C(26)  | 117.1(2)     | 116.0      |
| Re(1) – N(1) – C(30)  | 123.5(2)     | 124.0      |
| Re(1) – C(21) – N(9)  | 116.5(2)     | 118.0      |
| Re(1) – C(21) – N(20) | 138.9(2)     | 137.2      |
| Re(1) – C(3) – O(4)   | 178.7(3)     | 179.6      |
| Re(1) – C(5) – O(6)   | 178.8(3)     | 178.2      |
| Re(1) – C(7) – O(8)   | 177.4(3)     | 176.6      |
| C(26) – N(1) – C(30)  | 118.1(3)     | 118.2      |
| C(10) – N(9) – C(21)  | 110.6(2)     | 110.5      |
| C(10) – N(9) – C(26)  | 131.8(3)     | 132.1      |
| C(21) – N(9) – C(26)  | 115.5(3)     | 115.8      |
| C(19) – N(20) – C(21) | 112.0(2)     | 112.2      |
| N(9) – C(10) – C(19)  | 105.5(3)     | 105.4      |
| N(20) – C(19) – C(10) | 107.0(3)     | 107.0      |
| C(10) – C(19) – C(18) | 124.2(3)     | 123.8      |
| N(9) – C(21) – N(20)  | 104.6(3)     | 104.7      |
| N(1) – C(26) – N(9)   | 114.1(3)     | 113.83     |

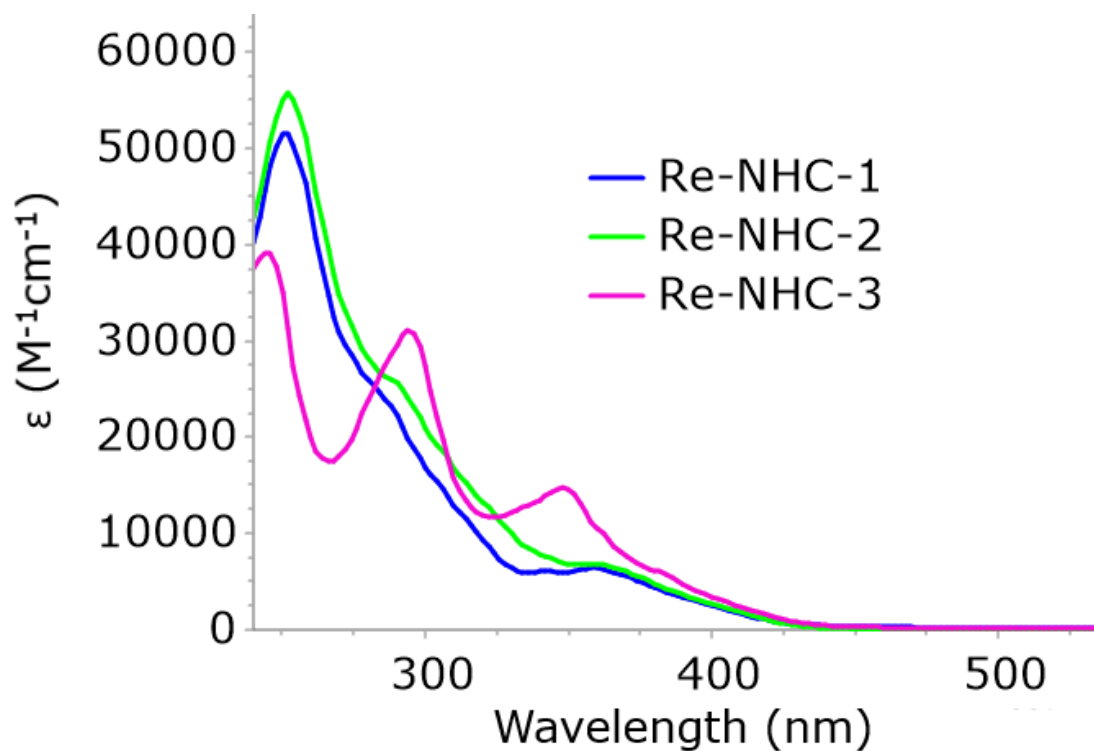

**Figure S1.** UV-Vis absorption spectra of Re-NHC-1–3 in dry acetonitrile at room temperature.

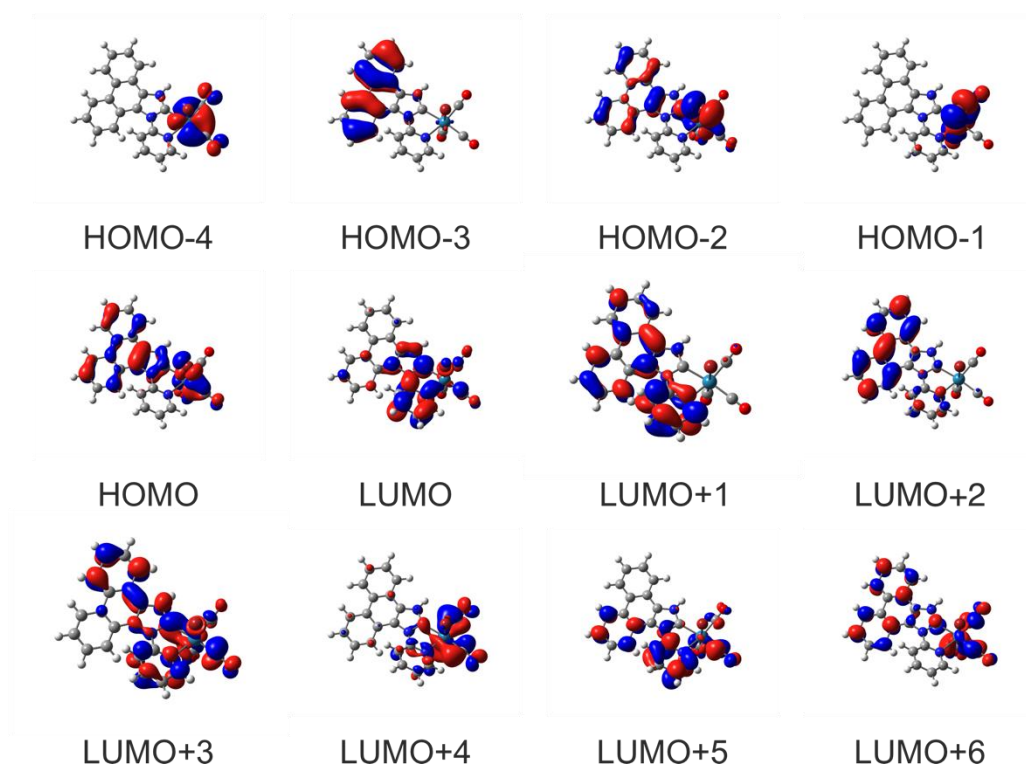

**Figure S2.** Molecular orbitals involved in electronic transitions detected in the experimental UV-Vis absorption spectrum of Re-NHC-1.

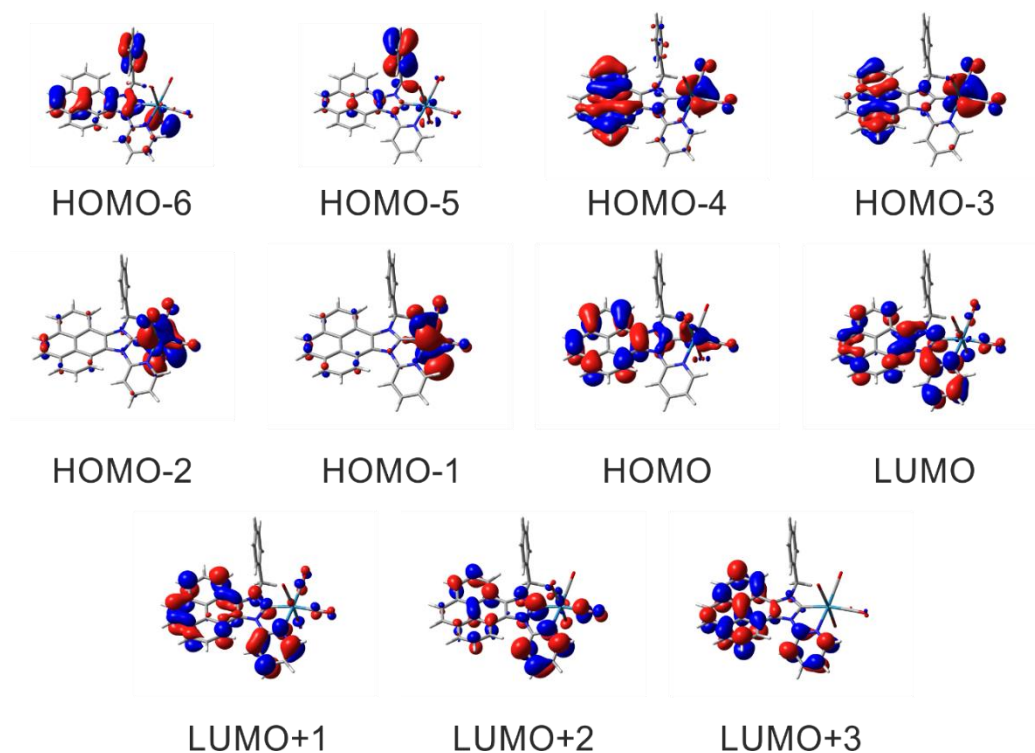

**Figure S3.** Molecular orbitals involved in electronic transitions detected in the experimental UV-Vis absorption spectrum of Re-NHC-3.

**Table S5.** Major electronic excitations in Re-NHC-1 determined by TD-DFT

| Complex  | Wavelength (nm) <sup>a</sup> | OS ( <i>f</i> ) <sup>b</sup> | Major contributions (%)                                            |
|----------|------------------------------|------------------------------|--------------------------------------------------------------------|
| Re-NHC-1 | 402 (405sh)                  | 0.0563                       | HOMO → LUMO (66)                                                   |
|          | 376 (358)                    | 0.067                        | HOMO-1 → LUMO (67)                                                 |
|          | 320 (290)                    | 0.096                        | HOMO → LUMO+3 (50)<br>HOMO → LUMO+4 (33)                           |
|          | 314 (290)                    | 0.1061                       | HOMO-3 → LUMO (51)<br>HOMO-1 → LUMO+1 (25)<br>HOMO → LUMO+2 (30)   |
|          | 304 (290)                    | 0.1053                       | HOMO-1 → LUMO+3 (31)<br>HOMO → LUMO+3 (30)<br>HOMO → LUMO+4 (36)   |
|          | 276 (250)                    | 0.1592                       | HOMO-3 → LUMO+1 (25)<br>HOMO → LUMO+6 (27)                         |
|          | 269 (250)                    | 0.3558                       | HOMO-3 → LUMO+2 (31)<br>HOMO → LUMO+6 (32)                         |
|          | 265 (250)                    | 0.3132                       | HOMO-3 → LUMO+2 (39)<br>HOMO-3 → LUMO+3 (33)<br>HOMO → LUMO+5 (27) |
|          | 263 (250)                    | 0.2147                       | HOMO-3 → LUMO+3 (43)                                               |
|          | 262 (250)                    | 0.105                        | HOMO-4 → LUMO+2 (40)                                               |
|          | 260 (250)                    | 0.1761                       | HOMO-4 → LUMO+2 (39)<br>HOMO-2 → LUMO+4 (37)                       |

<sup>a</sup> Corresponding experimental absorption in brackets. <sup>b</sup> OS = Oscillator Strength.



**Table S6.** Major electronic excitations in Re-NHC-3 determined by TD-DFT.

| Complex  | Wavelength (nm) <sup>a</sup> | OS ( <i>f</i> ) <sup>b</sup> | Major contributions (%)                                                                  |
|----------|------------------------------|------------------------------|------------------------------------------------------------------------------------------|
| Re-NHC-3 | 415 (400sh)                  | 0.0815                       | HOMO-1 → LUMO (21)<br>HOMO → LUMO (62)<br>HOMO → LUMO+1 (23)                             |
|          | 380 (384sh)                  | 0.0606                       | HOMO-2 → LUMO (24)<br>HOMO-1 → LUMO (56)<br>HOMO-1 → LUMO+1 (22)                         |
|          | 365 (348)                    | 0.1495                       | HOMO → LUMO+1 (61)<br>HOMO-2 → LUMO (26)                                                 |
|          | 328 (328sh)                  | 0.1412                       | HOMO → LUMO+2 (48)<br>HOMO → LUMO+3 (37)                                                 |
|          | 311 (295)                    | 0.0939                       | HOMO-4 → LUMO (25)<br>HOMO-2 → LUMO+2 (24)<br>HOMO-1 → LUMO+2 (40)<br>HOMO → LUMO+3 (22) |
|          | 309 (295)                    | 0.3027                       | HOMO-4 → LUMO (39)<br>HOMO-3 → LUMO (25)<br>HOMO-1 → LUMO+2 (33)<br>HOMO → LUMO+3 (21)   |
|          | 302 (280sh)                  | 0.0791                       | HOMO-6 → LUMO (44)<br>HOMO-5 → LUMO (35)<br>HOMO-3 → LUMO+1 (20)                         |
|          |                              |                              |                                                                                          |

<sup>a</sup> Corresponding experimental absorption in brackets. <sup>b</sup> OS = Oscillator Strength.

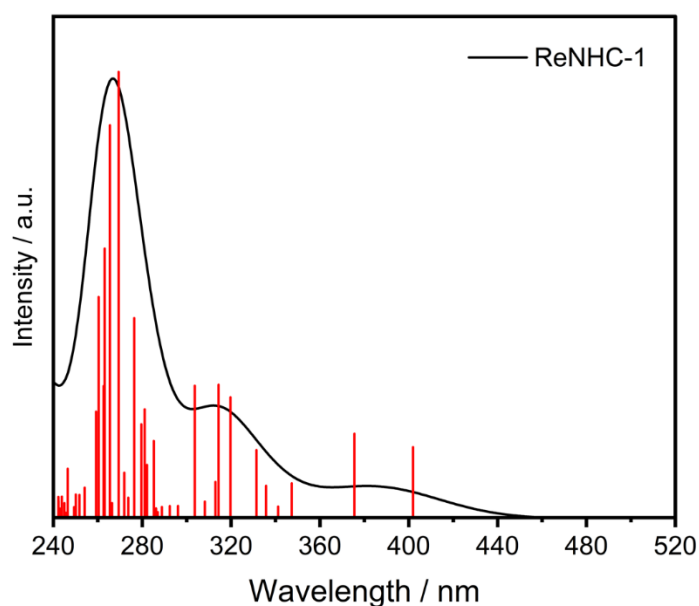

**Figure S4.** TD-DFT calculated electronic absorption spectrum of Re-NHC-1 in acetonitrile. The vertical excitations correspond to data in Table S5. The corresponding experimental spectrum in acetonitrile at 293 K is shown in Figure S1 (above) and Figure 2 (main text).

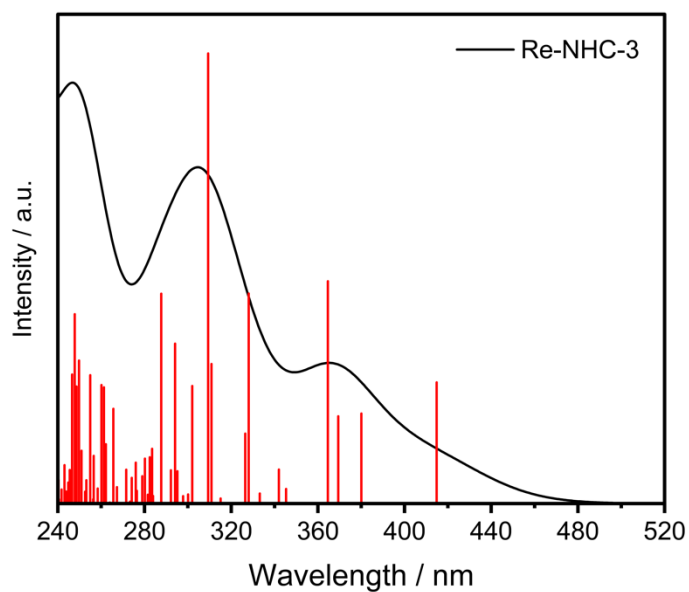

**Figure S5.** TD-DFT calculated electronic absorption spectrum of Re-NHC-3 in acetonitrile. The vertical excitations correspond to data in Table S6. The corresponding experimental spectrum in acetonitrile at 293 K is shown in Figure S1 (above) and Figure 2 (main text).

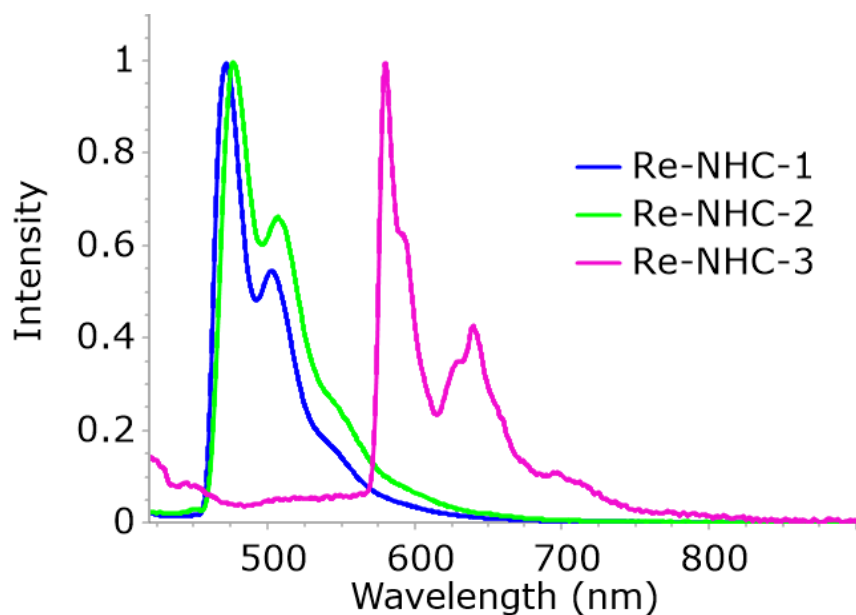

**Figure S6.** Emission spectra of **Re-NHC-1–3** in a beaker of ethanol–methanol 4:1 (v/v) at  $T = 77$  K;  $\lambda_{\text{exc}} = 375$  nm.

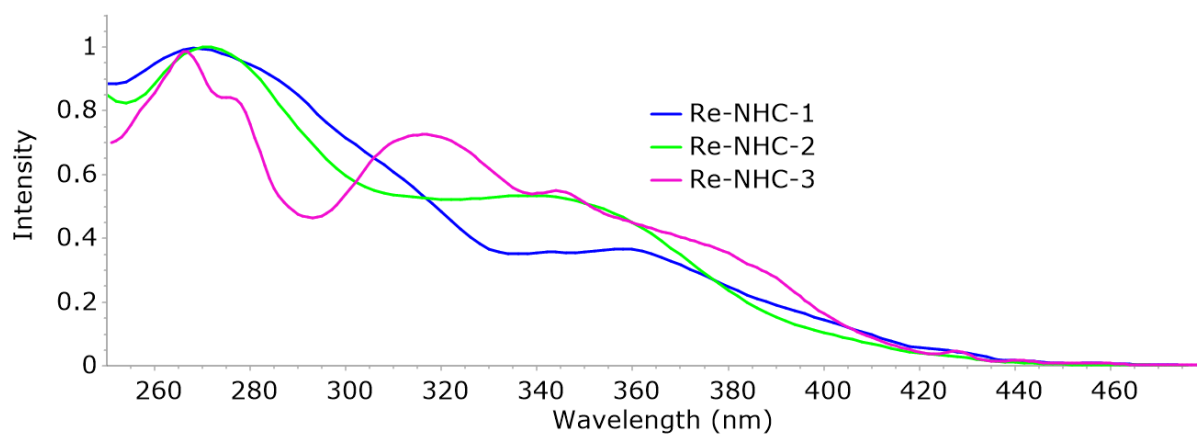

**Figure S7.** Excitation spectra of Re-NHC-1–3 in dry acetonitrile,  $\lambda_{\text{em}} = 490$  nm.

All luminescence lifetime measurements (Figures S6–S8) were carried out in dry acetonitrile. The solutions were deaerated using the freeze-pump-thaw method. Excitation wavelength of 375 nm was used for all samples.

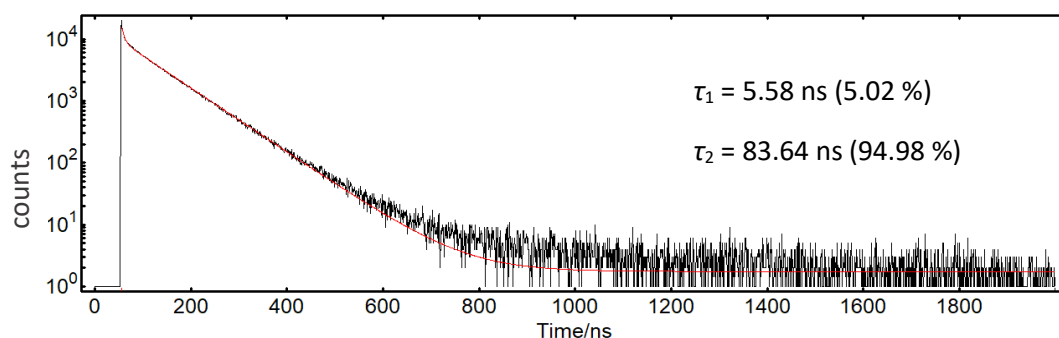

**Figure S8.** Emission decay of Re-NHC-1.

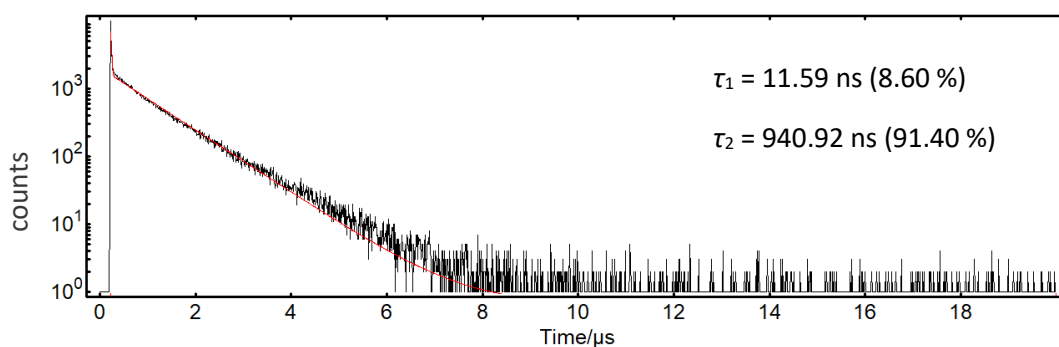

**Figure S9.** Emission decay of Re-NHC-2.

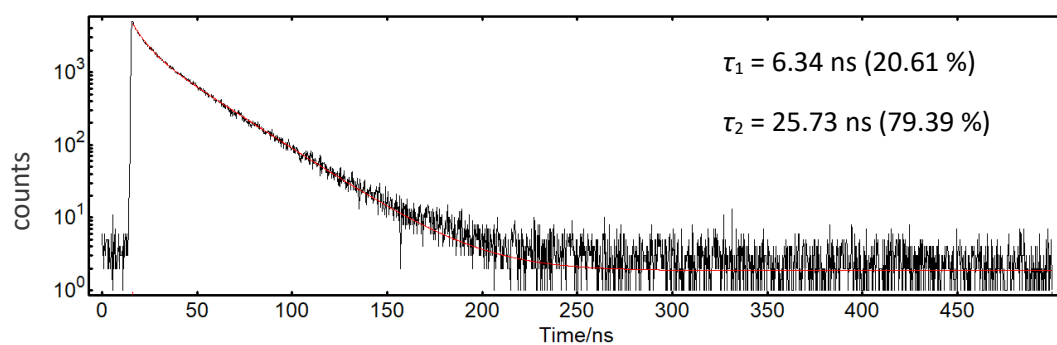

**Figure S10.** Emission decay of Re-NHC-3.

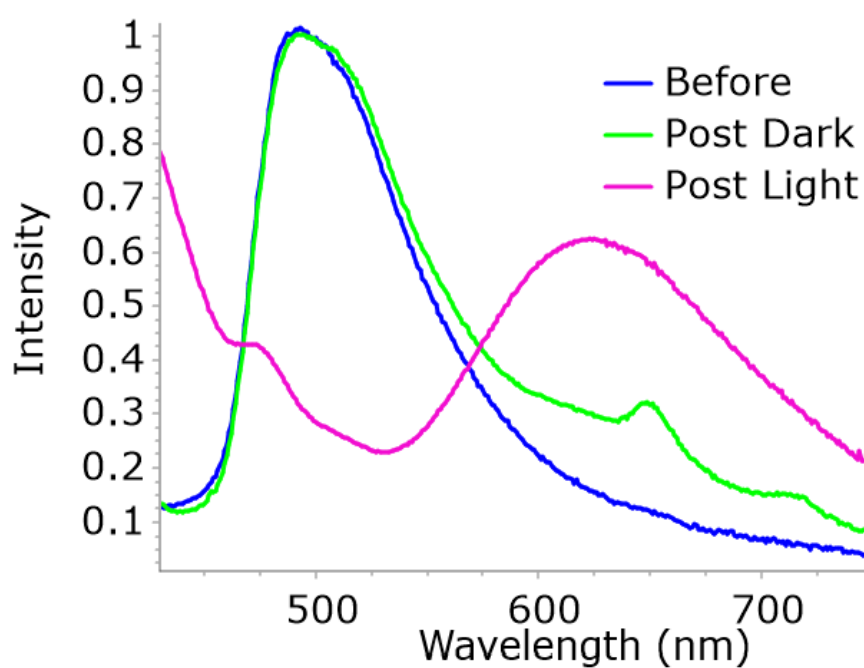

**Figure S11.** Changes observed in luminescence spectra of Re-NHC-1 in dry acetonitrile at ambient temperature (blue line) after standing 24 h in the dark (green line) and 24 h exposure to daylight/ceiling light (magenta line).

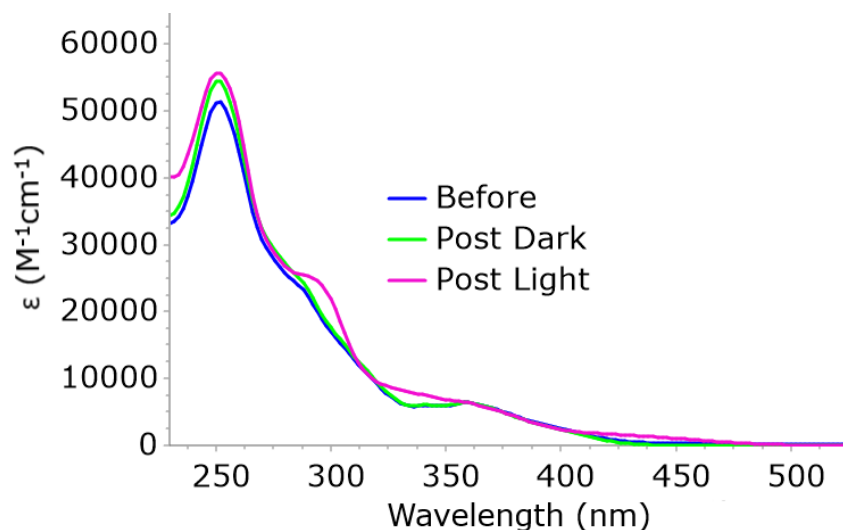

**Figure S12.** Changes observed in electronic absorption spectra of Re-NHC-1 in dry acetonitrile at ambient temperature (blue line) after standing 24 h in the dark (green line) and 24 h exposure to daylight/ceiling light (magenta line).

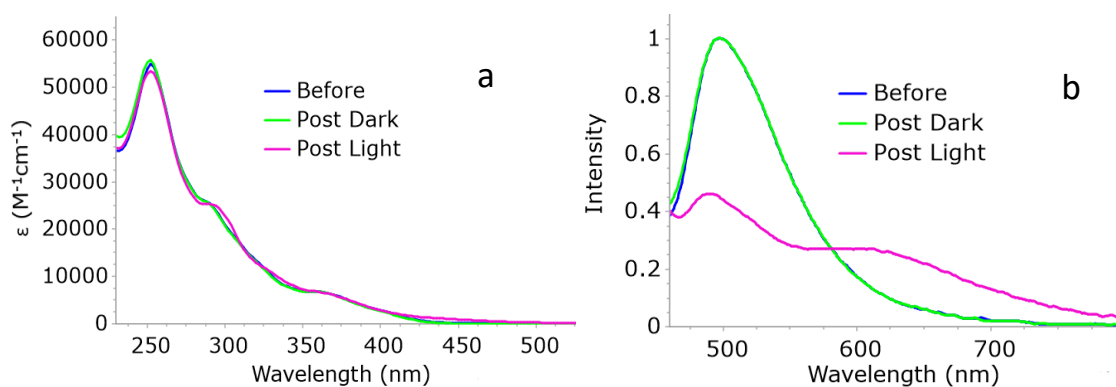

**Figure S13.** Changes in (a) electronic absorption, and (b) luminescence of Re-NHC-2 in dry acetonitrile at ambient temperature (blue lines) after standing 24 h in the dark (green lines) and 24 h exposure to daylight/ceiling light (magenta lines).

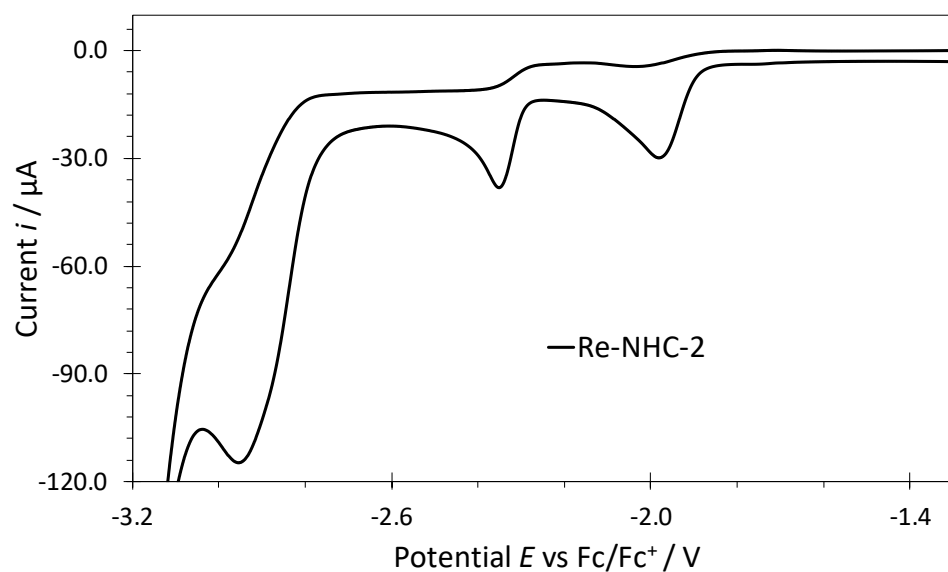

**Figure S14.** Cyclic voltammogram of 1 mM Re-NHC-2 in N<sub>2</sub>-purged acetonitrile/10<sup>-1</sup> M TBAPF<sub>6</sub>, extended above -2.6 V (cf. Figure 4(a,c) in the main text). The scan rate was 100 mV s<sup>-1</sup>.

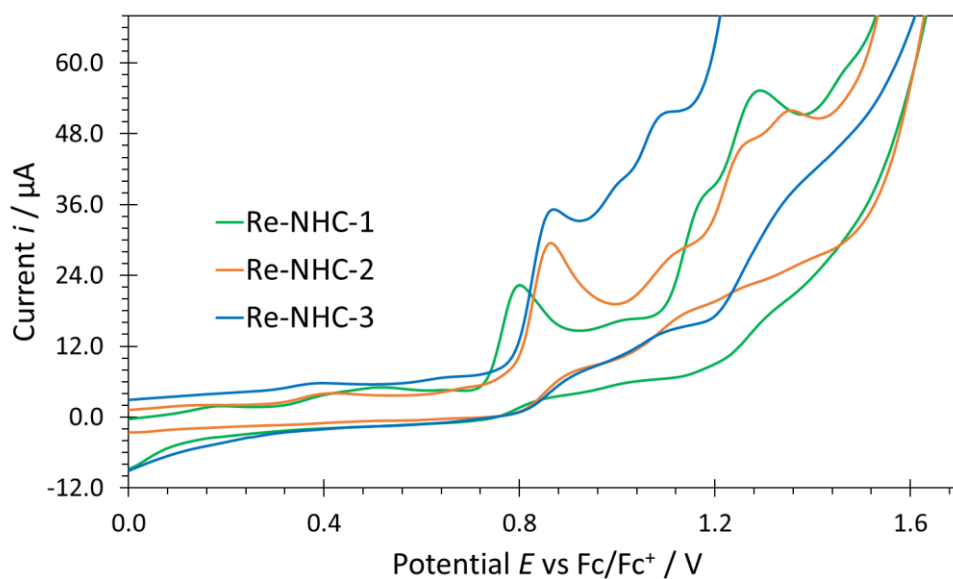

**Figure S15.** Cyclic voltammograms of 1 mM Re-NHC-1–3 (the oxidation potential range) in N<sub>2</sub>-purged dry acetonitrile/10<sup>-1</sup> M TBAPF<sub>6</sub>. All measurements were performed at the scan rate of 100 mV s<sup>-1</sup>.

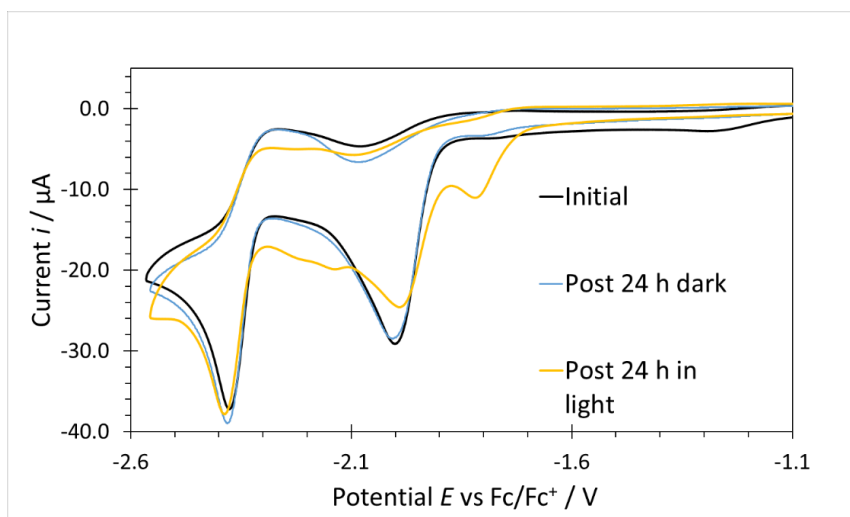

**Figure S16.** Changes in cyclic voltammograms of 1 mM Re-NHC-2 in N<sub>2</sub>-purged dry acetonitrile/10<sup>-1</sup> M TBAPF<sub>6</sub>, recorded directly after electrolyte preparation (black line), after the storage in the dark for 24 h (blue line) and after the exposure to daylight for 24 h (yellow line). Scan rate of 100 mV s<sup>-1</sup>.

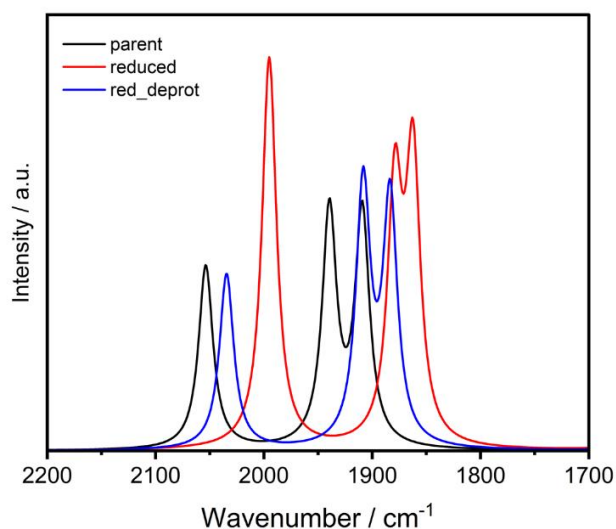

**Figure S17.** IR spectra in the CO-stretching region calculated by DFT for the parent complex Re-NHC-1 = [complex-Br] in the main text (black line) and the corresponding unstable singly reduced radical anion, [complex-Br]<sup>•-</sup> (red line) converting instantaneously by reductive deprotonation (N-H bond cleavage) to the stable anionic secondary product, [complex'-Br]<sup>-</sup> (blue line).

**Table S7:** Photocatalytic conversion of CO<sub>2</sub> to CO using BIH as sacrificial electron donor after 24 hours of irradiation.

| Catalyst | Solvent             | $\lambda_{\text{irr}}$ (nm) | TON  |
|----------|---------------------|-----------------------------|------|
| Re-NHC-1 | DMF:MeOH (6:2, v/v) | 355                         | 11   |
| Re-NHC-2 | DMF:MeOH (6:2, v/v) | 355                         | 10   |
| Re-NHC-3 | DMF:MeOH (6:2, v/v) | 470                         | 26   |
| Re-NHC-1 | DMF:TEA (6:2, v/v)  | 355                         | 0.14 |
| Re-NHC-3 | DMF:TEA (6:2, v/v)  | 355                         | 1.64 |
| Re-NHC-1 | DMF:TEOA (6:2, v/v) | 355                         | 0.47 |
| Re-NHC-3 | DMF:TEOA (6:2, v/v) | 355                         | 6.22 |

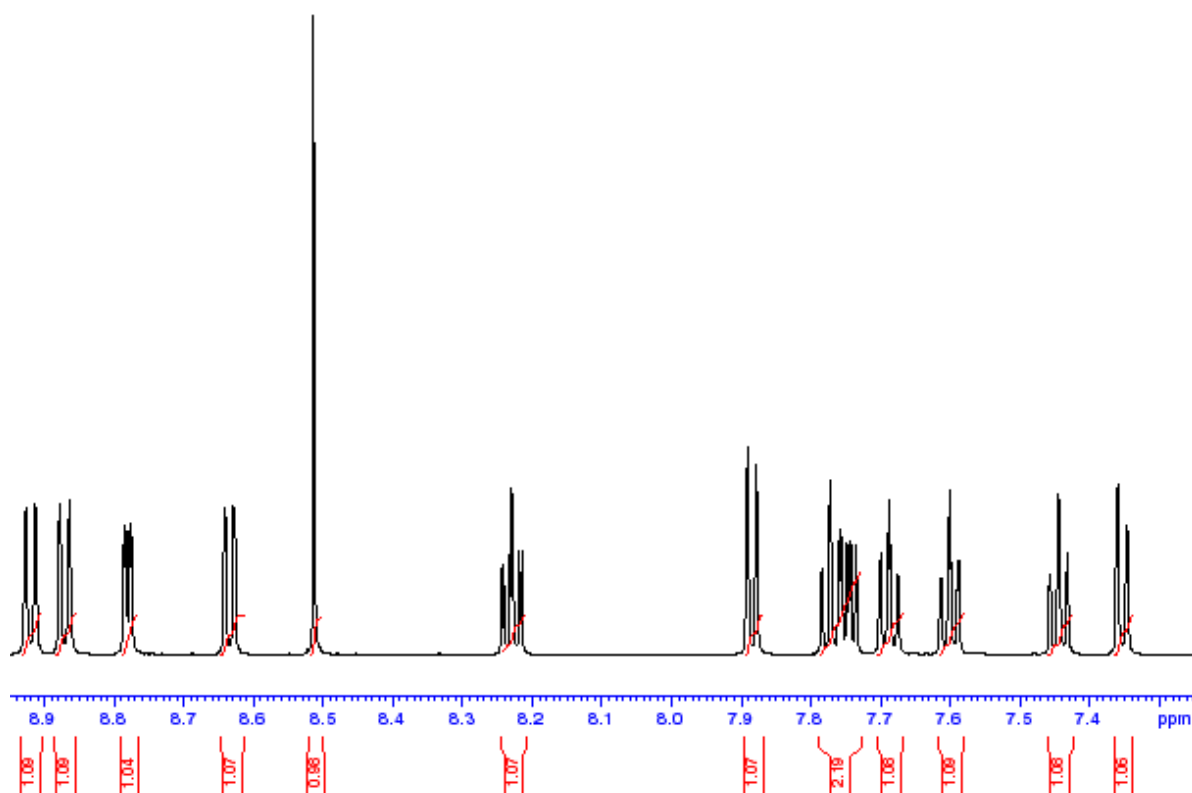

**Figure S18.** <sup>1</sup>H NMR spectrum of NHC-1 in DMSO-*d*<sub>6</sub>, 600 MHz.



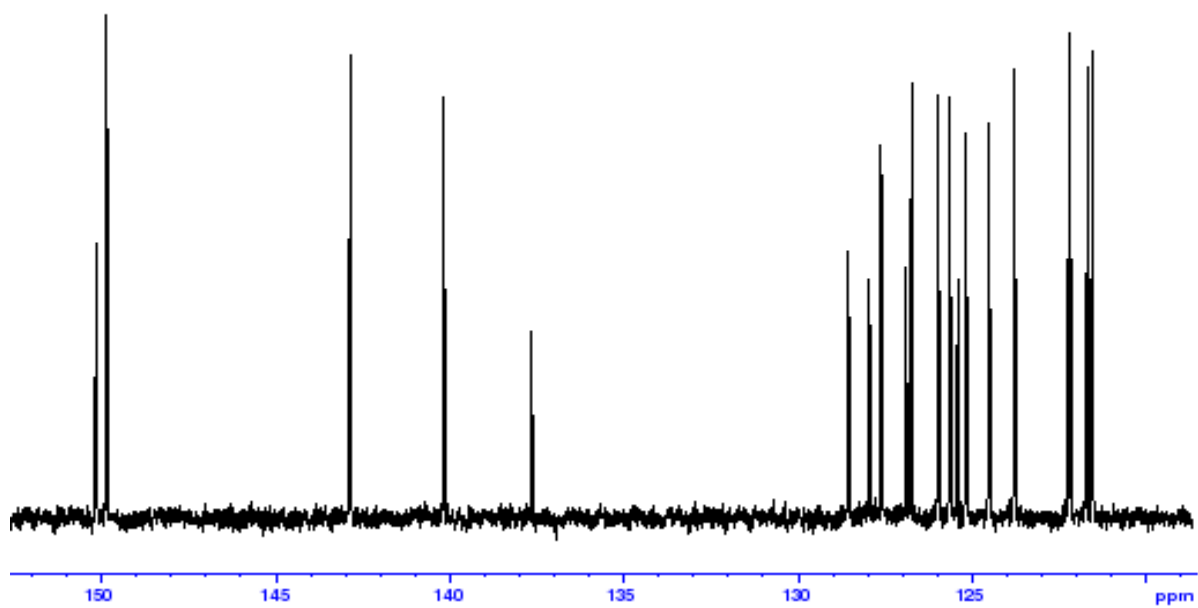

**Figure S19.**  $^{13}\text{C}$  NMR spectrum of NHC-1 in  $\text{DMSO-}d_6$ , 150 MHz.

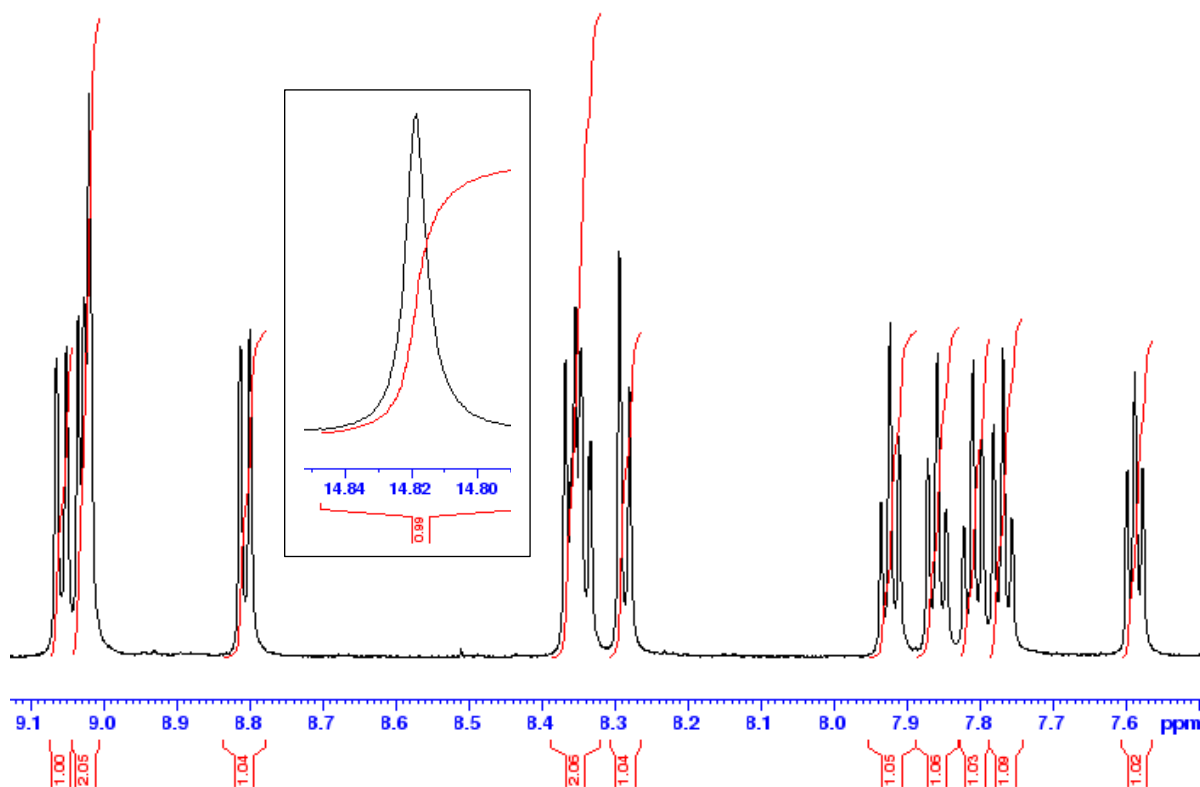

**Figure S20.**  $^1\text{H}$  NMR spectrum of Re-NHC-1 in  $\text{DMSO-}d_6$ , 600 MHz. The peak at ca. 14.8 ppm is included as an inset.

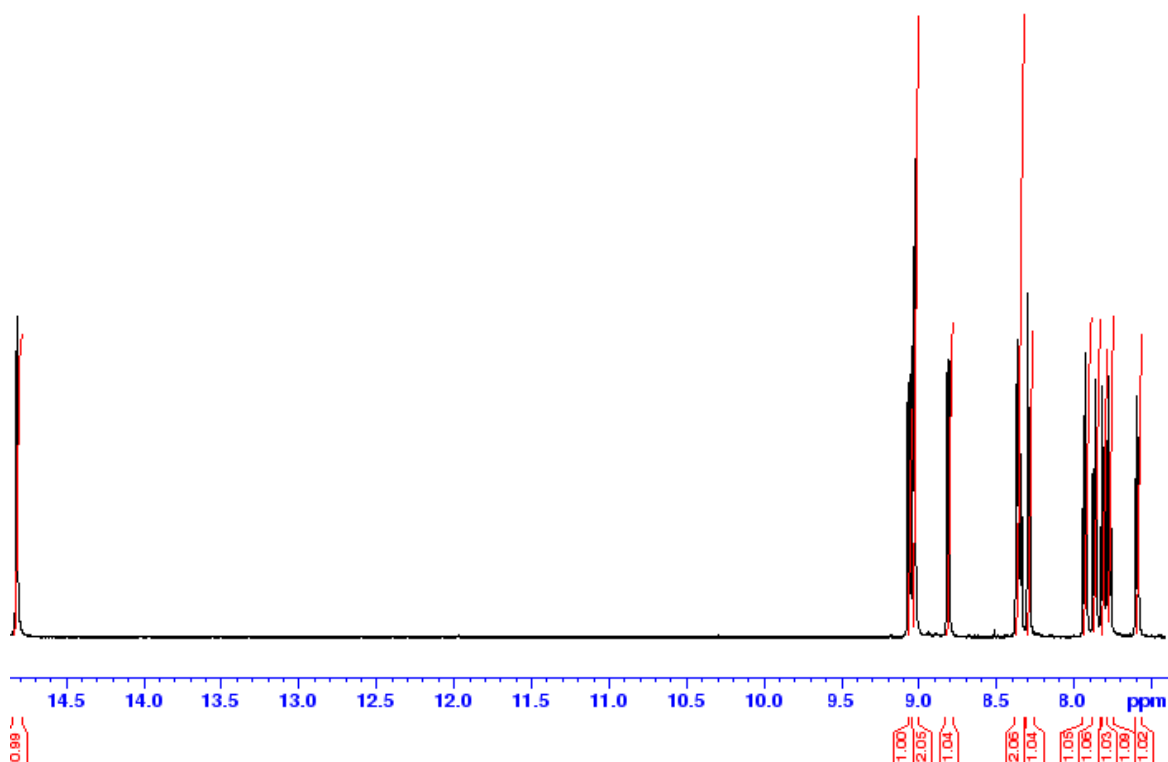

**Figure S21.** Extended  $^1\text{H}$  NMR spectrum of Re-NHC-1 in  $\text{DMSO-}d_6$ , 600 MHz.

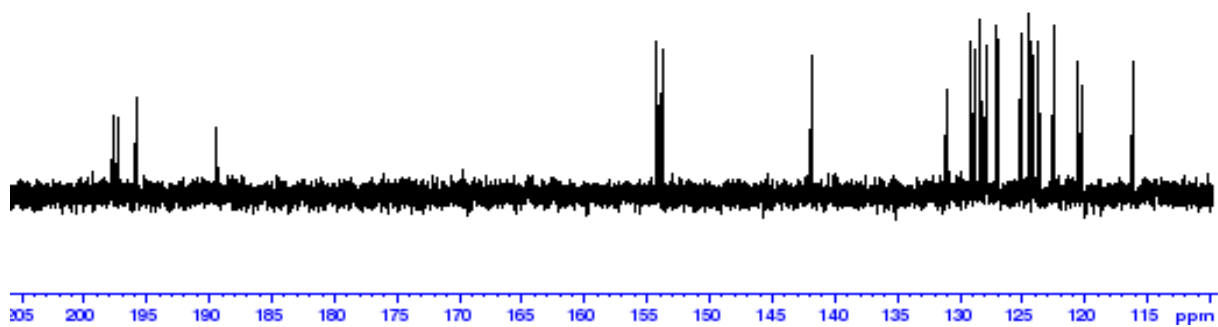

**Figure S22.**  $^{13}\text{C}$  NMR spectrum of Re-NHC-1 in  $\text{DMSO}-d_6$ , 150 MHz.

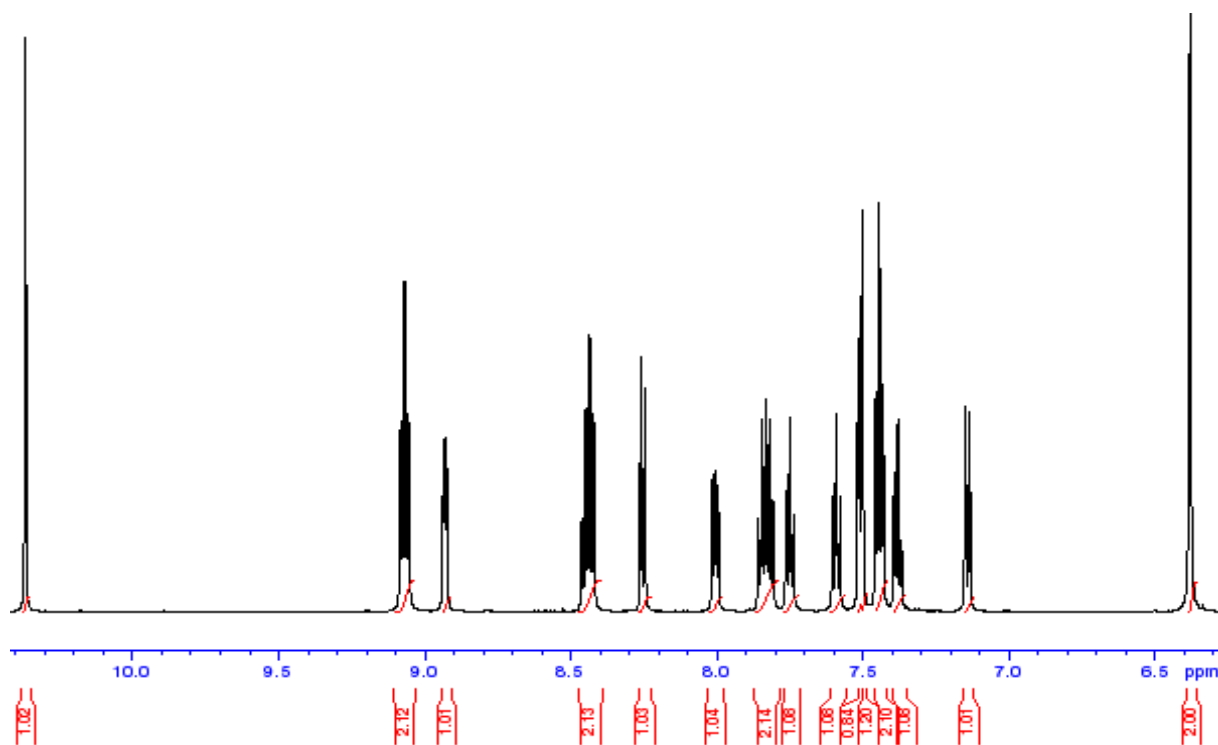

**Figure S23.**  $^1\text{H}$  NMR spectrum of NHC-2 in  $\text{DMSO}-d_6$ , 600 MHz.

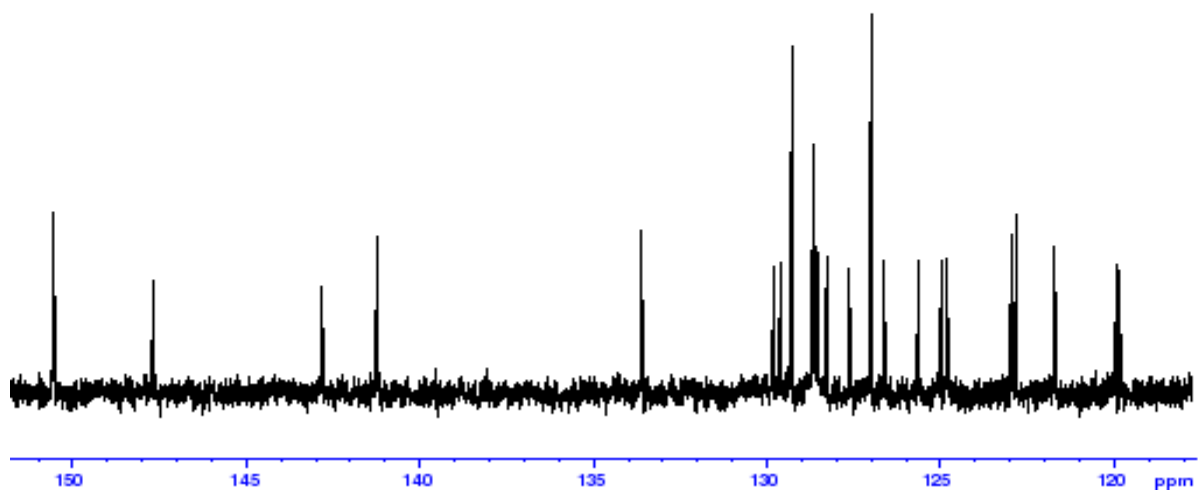

**Figure S24.**  $^{13}\text{C}$  NMR spectrum of NHC-2 in  $\text{DMSO-}d_6$ , 150 MHz.

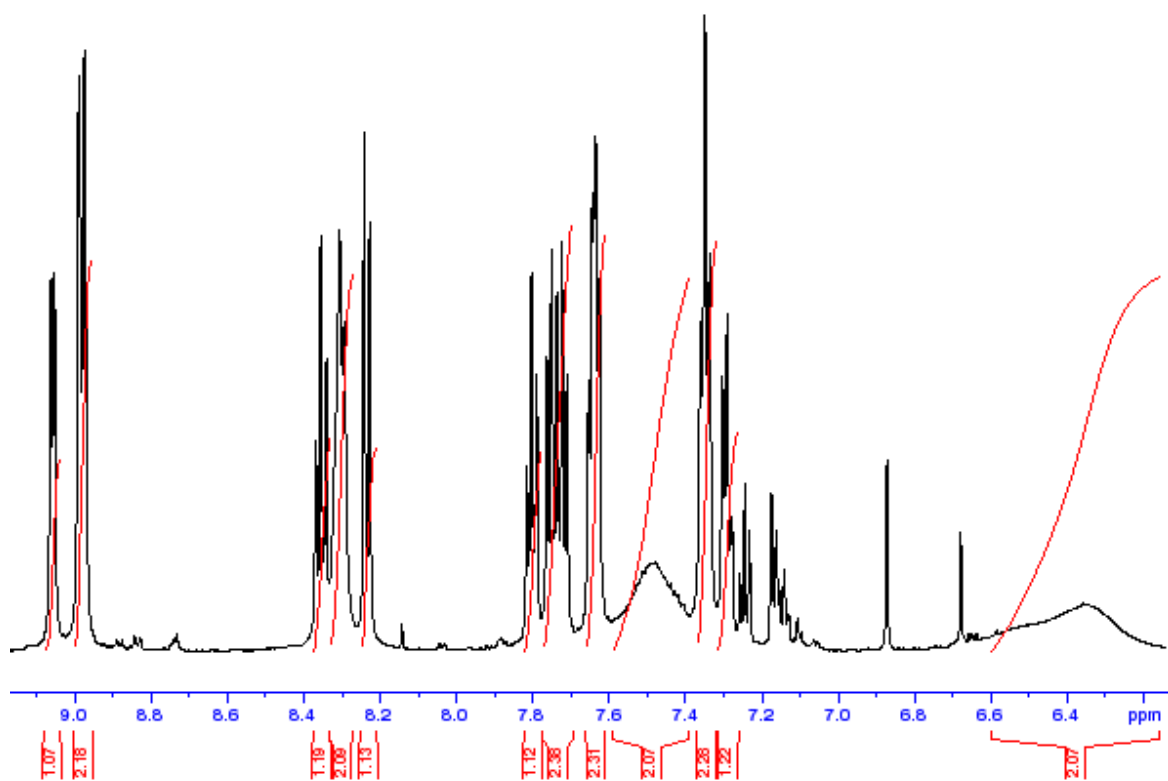

**Figure S25:**  $^1\text{H}$  NMR spectrum of Re-NHC-2 in  $\text{DMSO-}d_6$ , 600 MHz.

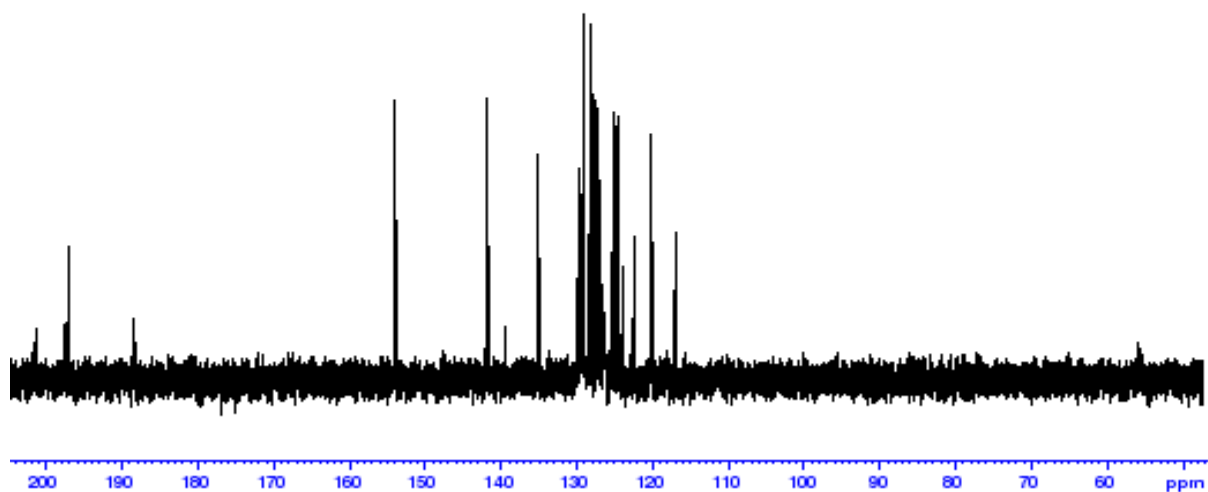

**Figure S26.**  $^{13}\text{C}$  NMR spectrum of Re-NHC-2 in  $\text{DMSO}-d_6$ , 150 MHz.

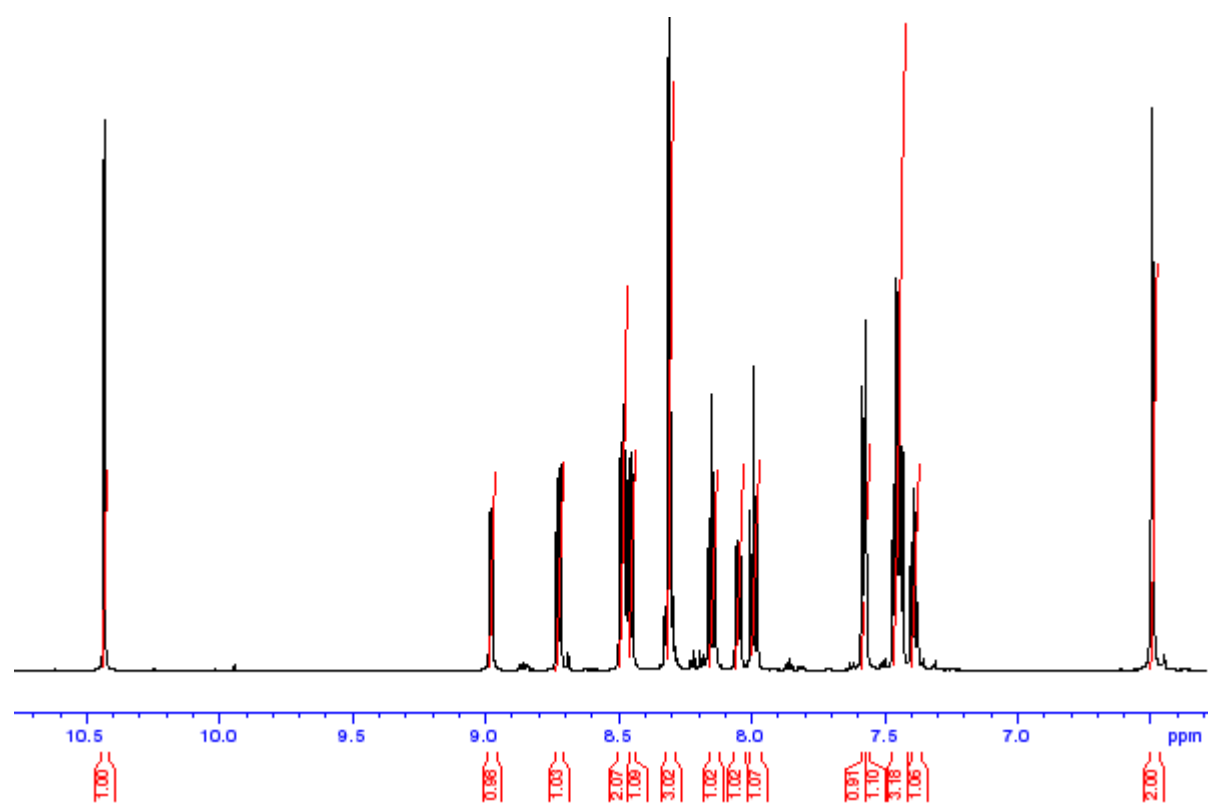

**Figure S27.**  $^1\text{H}$  NMR spectrum of NHC-3 in  $\text{DMSO}-d_6$ , 600 MHz.

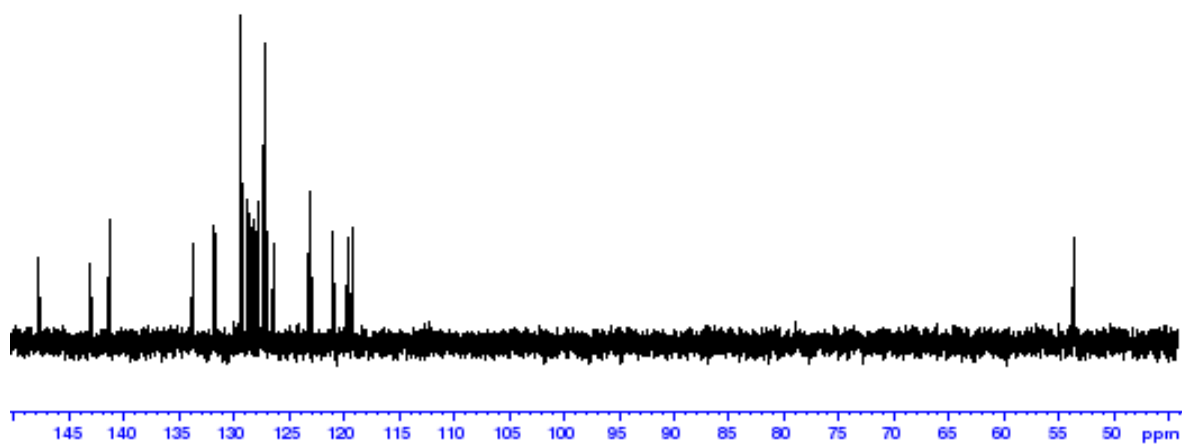

**Figure S28.**  $^{13}\text{C}$  NMR spectrum of NHC-3 in DMSO- $d_6$ , 150 MHz.

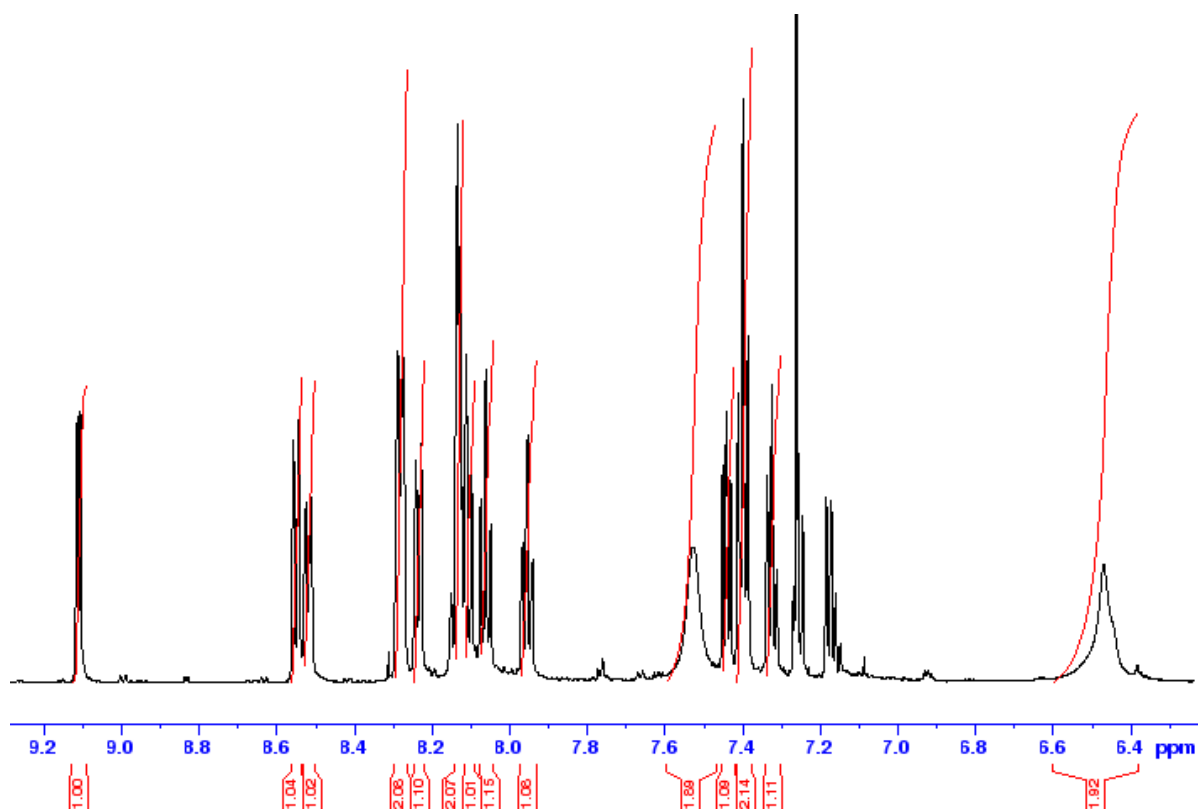

**Figure S29.**  $^1\text{H}$  NMR spectrum of Re-NHC-3 in  $\text{CDCl}_3$ , 600 MHz.

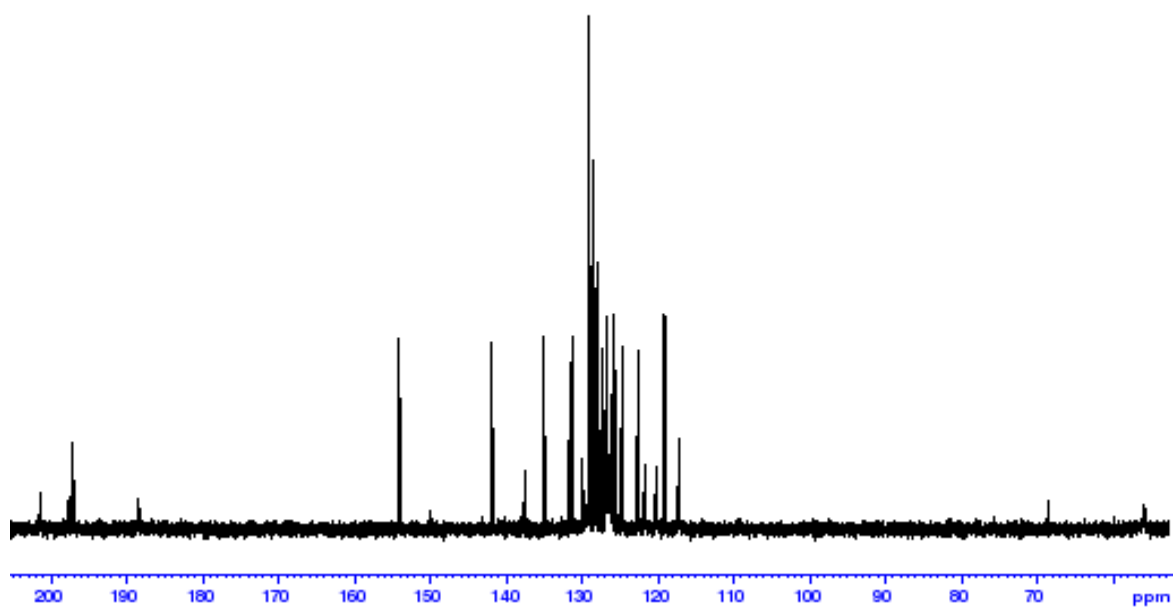

**Figure S30.**  $^{13}\text{C}$  NMR spectrum of Re-NHC-3 in  $\text{DMSO-}d_6$ , 150 MHz.
